# Molecular Analysis of the Freshwater Prawn *Macrobrachium olfersii* (Decapoda, Palaemonidae) Supports the Existence of a Single Species throughout Its Distribution

Natália Rossi\*, Fernando Luis Mantelatto\*

Laboratory of Bioecology and Crustacean Systematics (LBSC), Program in Comparative Biology, Department of Biology, Faculty of Philosophy, Science and Letters of Ribeirão Preto (FFCLRP), University of São Paulo (USP), Ribeirão Preto, São Paulo, Brazil

## Abstract

*Macrobrachium olfersii* is an amphidromous freshwater prawn, widespread along the eastern coasts of the Americas. This species shows great morphological modifications during ontogenesis, and several studies have verified the existence of a wide intraspecific variation. Because of this condition, the species is often misidentified, and several synonyms have been documented. To elucidate these aspects, individuals of *M. olfersii* from different populations along its range of distribution were investigated. The taxonomic limit was established, and the degree of genetic variability of this species was described. We extracted DNA from 53 specimens of *M. olfersii*, *M. americanum*, *M. digueti* and *M. faustinum*, which resulted in 84 new sequences (22 of 16S mtDNA, 45 of Cythochrome Oxidase I (COI) mtDNA, and 17 of Histone (H3) nDNA). Sequences of three genes (single and concatenated) from these species were used in the Maximum Likelihood and Bayesian Inference phylogenetic analyses and COI sequences from *M. olfersii* were used in population analysis. The genetic variation was evaluated through the alignment of 554 bp from the 16S, 638 bp from the COI, and 338 bp from the H3. The rates of genetic divergence among populations were lower at the intraspecific level. This was confirmed by the haplotype net, which showed a continuous gene flow among populations. Although a wide distribution and high morphological intraspecific variation often suggest the existence of more than one species, genetic similarity of Caribbean and Brazilian populations of *M. olfersii* supported them as a single species.

**Citation:** Rossi N, Mantelatto FL (2013) Molecular Analysis of the Freshwater Prawn *Macrobrachium olfersii* (Decapoda, Palaemonidae) Supports the Existence of a Single Species throughout Its Distribution. PLoS ONE 8(1): e54698. doi:10.1371/journal.pone.0054698

**Editor:** Keith A. Crandall, George Washington University, United States of America

**Received:** August 30, 2012; **Accepted:** December 17, 2012; **Published:** January 31, 2013

**Copyright:** © 2013 Rossi, Mantelatto. This is an open-access article distributed under the terms of the Creative Commons Attribution License, which permits unrestricted use, distribution, and reproduction in any medium, provided the original author and source are credited.

**Funding:** This contribution is part of a multidisciplinary research project Temático BIOTA – FAPESP (Fundação de Amparo à Pesquisa do Estado de São Paulo), which aims to produce a fine-scale assessment of the marine/estuarine decapod biodiversity. This research is also part of the MSc Dissertation of NR and was supported by a fellowship from the Fundação de Amparo à Pesquisa do Estado de São Paulo – FAPESP (2009/12409-5). Partial support for visits to European museums was provided by the Senckenberg Naturmuseum und Forschungsinstitut to NR. Additional support for this study was also provided by FAPESP (Temático Biota 2010/50188-8; Coleções Científicas 2009/54931-0) and Conselho Nacional de Desenvolvimento Científico e Tecnológico (CNPq - Research Grants 472746/2004-9, 473050/2007-2, 491490/2004-6, 490353/2007-0, 471011/2011-8; Research Scholarships PQ 301261/2004-0, 302748/2010-5) to FLM. The ongoing PhD fellowship to NR was awarded by CAPES. The funders had no role in study design, data collection and analysis, decision to publish, or preparation of the manuscript.

**Competing Interests:** The authors have declared that no competing interests exist.

\* E-mail: nataliarossi.bio@gmail.com; flmantel@usp.br

## Introduction

Prawns of the genus *Macrobrachium* Spence Bate, 1861 are important members of freshwater and estuarine systems [1,2]. The diversity of species is tremendous, with more than 240 species recognized worldwide [3,4]. Some of them need estuarine and freshwater to complete their life cycle, which implicates in recurring migrations between both environments. The prawns that have this behavior are called as amphidromous and they show many larval and reproductive peculiarities [5]. In some amphidromous freshwater shrimps, the females live in freshwater and migrate downstream, near to estuaries, where the hatching occurs. After larval development in salt water, the juveniles migrate up to the freshwater [6]. *Macrobrachium olfersii* (Wiegmann, 1836) is one these species, with larval stages requiring high salinity during development [7,8]. Therefore, it is finding along of coastland and its geographic distribution covers almost all the eastern coasts of

the Americas, from the southern United States, where the prawns were introduced [9,10,11], to Mexico, Guatemala, Costa Rica, Panama, and Venezuela to southern Brazil [12,9,11,13,14,15].

Species that have a wide distribution, in heterogeneous or geographically isolated environments can have a phenotype variation, because they are prone to show plastic responses to different environmental influences. Further these plasticity environment-dependent, the phenotypic variations also can stem from genetic or behavior differences between individuals, from ontogenetic developmental or combining of all these factors [16]. On the other hand, morphological characters may often be undergoing convergent evolution as they are under similar selective pressure [17]. The species of the genus *Macrobrachium* have high intraspecific variation and a single species may have genetic diversity and structured populations [18].

*Macrobrachium olfersii* is in this context, it has a wide distribution and a great morphological variation during its ontogenesis

**Table 1.** Sequences of *Macrobrachium* and outgroup species used this study.

| Species                         | Sample locality             | Abbrev. | Catalogue no. | GenBank accession code |                 |                 |
|---------------------------------|-----------------------------|---------|---------------|------------------------|-----------------|-----------------|
|                                 |                             |         |               | 16S                    | COI             | H3              |
| <i>Macrobrachium americanum</i> | Costa Rica (Pacific)        | CR-PA   | CCDB 2883     | JQ805797               | JQ805899        | JQ805861        |
| <i>Macrobrachium digueti</i>    | Mexico (Pacific)            | MX-PA   | CNCR 24811    | –                      | JQ805905        | –               |
| <i>Macrobrachium digueti</i>    | Costa Rica (Pacific)        | CR-PA   | CCDB 2882     | JQ805806               | JQ805903        | JQ805868        |
| <i>Macrobrachium digueti</i>    | Costa Rica (Pacific)        | CR-PA   | CCDB 3091     | JQ805807               | JQ805904        | JQ805869        |
| <i>Macrobrachium faustinum</i>  | Jamaica (northeast)         | JM-NE   | RMNHD 17613   | JQ805809               | JQ805907        | –               |
| <i>Macrobrachium lar</i>        | N/A                         | –       | GUMB 992      | <b>EF588316</b>        | –               | <b>EU249462</b> |
| <i>Macrobrachium lar</i>        | China (Taiwan)              | CH-TW   | –             | –                      | <b>AB235270</b> | –               |
| <i>Macrobrachium olfersii</i>   | Mexico                      | MX      | –             | <b>AY377849</b>        | –               | –               |
| <i>Macrobrachium olfersii</i>   | Costa Rica (Atlantic)       | CR-AT   | CCDB 2876     | JQ805835               | JQ805933        | JQ805887        |
| <i>Macrobrachium olfersii</i>   | Costa Rica (Atlantic)       | CR-AT   | CCDB 2874     | JQ805838               | JQ805935        | JQ805889        |
|                                 |                             |         |               |                        | JQ805957        |                 |
|                                 |                             |         |               |                        | JQ805958        |                 |
| <i>Macrobrachium olfersii</i>   | Costa Rica (Atlantic)       | CR-AT   | CCDB 2880     | JQ805839               | JQ805936        | JQ805890        |
| <i>Macrobrachium olfersii</i>   | Costa Rica (Atlantic)       | CR-AT   | CCDB 3754     | –                      | JQ805938        | –               |
| <i>Macrobrachium olfersii</i>   | Panama (Atlantic)           | PN-PA   | CCDB 2884     | JQ805840               | JQ805937        | JQ805891        |
|                                 |                             |         |               |                        | JQ805959        |                 |
|                                 |                             |         |               |                        | JQ805960        |                 |
| <i>Macrobrachium olfersii</i>   | Venezuela (northwest)       | VZ-NW   | IVIC 1083     | JQ805837               | JQ805934        | JQ805888        |
| <i>Macrobrachium olfersii</i>   | Venezuela (Isla Margarita)  | VZ-IM   | CCDB 2446     | JQ805836               | JQ805932        | JQ805886        |
| <i>Macrobrachium olfersi</i>    | Brazil (Bahia)              | BR-BA   | CCDB 2720     | JQ805833               | JQ805930        | –               |
|                                 |                             |         |               |                        | JQ805956        |                 |
| <i>Macrobrachium olfersii</i>   | Brazil (Bahia)              | BR-BA   | CCDB 2439     | JQ805827               | JQ805924        | JQ805881        |
| <i>Macrobrachium olfersii</i>   | Brazil (Espírito Santo)     | BR-ES   | CCDB 3084     | JQ805826               | JQ805923        | JQ805880        |
| <i>Macrobrachium olfersii</i>   | Brazil (Espírito Santo)     | BR-ES   | CCDB 3082     | JQ805832               | JQ805929        | JQ805885        |
|                                 |                             |         |               |                        | JQ805955        |                 |
| <i>Macrobrachium olfersii</i>   | Brazil (Rio de Janeiro)     | BR-RJ   | CCDB 2213     | JQ805829               | JQ805926        | JQ805882        |
|                                 |                             |         |               |                        | JQ805952        |                 |
|                                 |                             |         |               |                        | JQ805953        |                 |
|                                 |                             |         |               |                        | JQ805954        |                 |
| <i>Macrobrachium olfersii</i>   | Brazil (northern São Paulo) | BR-SPn  | CCDB 1851     | JQ805834               | –               | –               |
| <i>Macrobrachium olfersii</i>   | Brazil (northern São Paulo) | BR-SPn  | CCDB 2423     | JQ805828               | JQ805925        | –               |
|                                 |                             |         |               |                        | JQ805949        |                 |
|                                 |                             |         |               |                        | JQ805950        |                 |
|                                 |                             |         |               |                        | JQ805951        |                 |
| <i>Macrobrachium olfersii</i>   | Brazil (southern São Paulo) | BR-SPs  | CCDB 2503     | –                      | JQ805931        | –               |
|                                 |                             |         |               |                        | JQ805946        |                 |
|                                 |                             |         |               |                        | JQ805947        |                 |
|                                 |                             |         |               |                        | JQ805948        |                 |
| <i>Macrobrachium olfersii</i>   | Brazil (Paraná)             | BR-PR   | CCDB 2445     | JQ805830               | JQ805927        | JQ805883        |
| <i>Macrobrachium olfersii</i>   | Brazil (Paraná)             | BR-PR   | CCDB 2279     | JQ805824               | JQ805921        | JQ805878        |
|                                 |                             |         |               |                        | JQ805943        |                 |
|                                 |                             |         |               |                        | JQ805944        |                 |
|                                 |                             |         |               |                        | JQ805945        |                 |
| <i>Macrobrachium olfersii</i>   | Brazil (Santa Catarina)     | BR-SC   | CCDB 1929     | JQ805831               | JQ805928        | JQ805884        |
| <i>Macrobrachium olfersii</i>   | Brazil (Santa Catarina)     | BR-SC   | CCDB 1924     | JQ805825               | JQ805922        | JQ805879        |

**Table 1. Cont.**

| Species                       | Sample locality  | Abbrev. | Catalogue no. | GenBank accession code |                 |                 |
|-------------------------------|------------------|---------|---------------|------------------------|-----------------|-----------------|
|                               |                  |         |               | 16S                    | COI             | H3              |
|                               |                  |         |               |                        | JQ805939        |                 |
|                               |                  |         |               |                        | JQ805940        |                 |
|                               |                  |         |               |                        | JQ805941        |                 |
|                               |                  |         |               |                        | JQ805941        |                 |
|                               |                  |         |               |                        | JQ805942        |                 |
| <i>Cryphiops caementarius</i> | –                | –       | JC 1219       | <b>DQ079711</b>        | –               | <b>DQ079672</b> |
| <i>Cryphiops caementarius</i> | Chile (Coquimbo) | CL-CO   | CCDB 1870     | –                      | <b>HM352495</b> | –               |

Sample localities, locality abbreviations (Abbrev.), catalogue numbers, and GenBank accession codes are provided. The codes of sequences that were retrieved from GenBank are bold type.

Museum/collection abbreviations: CCDB: Crustacean Collection of the Department of Biology, Faculty of Philosophy, Sciences and Letters of Ribeirão Preto, University of São Paulo; MZUSP: Museu de Zoologia da Universidade de São Paulo; CNCR: Colección Nacional de Crustáceos de la Universidad Nacional Autónoma de México; IVIC: Instituto Venezolano de Investigaciones Científicas; UCR: Museo de Zoología de la Universidad de Costa Rica; RMNH: National Museum of Natural History, Leiden, The Netherlands.

doi:10.1371/journal.pone.0054698.t001

[19,20,21,22], including the possibility of morphotypes within the species. This fact have already observed in other congeneric species such as *Macrobrachium rosenbergii* (de Man, 1879), *M. amazonicum* (Heller, 1862) and *M. grandimanus* [23,24,25]. The presence of plastic characters in the genus *Macrobrachium* makes the accurate determination of species more difficult and problematic [10,26].

Commonly, *Macrobrachium olfersii* is confused with species that occur preferentially in Central America such as *M. faustinum* (Saussure, 1857), *M. crenulatum* Holthuis, 1950, *M. digueti* (Bouvier, 1895), *M. hancocki* Holthuis, 1950, and *M. acanthochirus* Villalobos, 1967. Because of their close morphological similarities, these species were designated as a possible species complex by Villalobos [10]. Recently, *Macrobrachium birai* Lobão, Melo & Fernandez, 1986 and *Macrobrachium holthuisi* Genofre & Lobão, 1978 were considered junior synonyms of *M. olfersii* [27,28].

Together, this information illustrates that sometimes morphological analysis alone is not sufficient to resolve the diversity of species complexes. The addition of molecular data has proven very useful to elucidate the taxonomic relationships in morphologically variable groups of freshwater prawns [29,2,27,18,30,31]. Molecular markers can be useful in delimiting boundaries between lineages and/or species and can help in the interpretation of biodiversity patterns [32,33,27,18,31]. The mitochondrial markers, such as 16S and Cytochrome Oxidase I (COI), have high mutation rate, which makes it very useful at intraspecific levels, but causes increasing saturation when older splits are analyzed. Therefore, the combination of mtDNA with more conserved nuclear markers, such as Histone 3 (H3), may be used to support phylogenetic conclusions [34,35]. The H3 is considered a small gene with about 350 bp, which are very conservative and relative ease to amplify. When we combined nuclear with mitochondrial genes, we provide a broad spectrum of inference and great insights into the evolutionary history of *Macrobrachium*.

Considering that *Macrobrachium* inhabits heterogeneous environments and shows morphological dissimilarity and genetic variability within populations [18], this study examined individuals of *M. olfersii* from different populations along its distribution, in order to establish the taxonomic boundaries and to describe the degree of genetic variability.

## Materials and Methods

### Sample Collection

Some specimens of *M. olfersii* were obtained from field collections in different locations, under license from the appropriate authorities (Table 1). The collections of species conducted in this study complied with current applicable state and federal laws of Brazil (DIFAP/IBAMA 126/05; permanent license to FLM for collection of Zoological Material N°. 11777-1 MMA/IBAMA/SISBIO). No material were obtained from national park or other protected area of land and we confirm that the field studies did not involve endangered or protected species.

We have collected about six individuals per site from coastal drainage of Costa Rica, Panama and different places from Brazil (States of Bahia, Espírito Santo, Rio de Janeiro, São Paulo, Paraná and Santa Catarina) (Table 1), by sieving amongst marginal vegetation and under the rocky bottom of rivers and streams. After sampling, individuals were separated, immediately preserved in ethanol (80%) and deposited in Crustacean Collection of the Biology Department (CCDB) of the Faculty of Philosophy, Sciences and Letters of Ribeirão Preto (FFCLRP) at the University of São Paulo (USP) (Permanent license for Crustacean Collection N°. 071/2012/SECEX/CGEN).

Additional material was also obtained via donation or loan from the following museums and crustacean collections: Museum of Zoology, University of São Paulo, São Paulo, Brazil (MZUSP); Colección Nacional de Crustáceos de La Universidad Nacional Autónoma de México, Mexico City, Mexico (CNCR); Instituto Venezolano de Investigaciones Científicas, Venezuela (IVIC); Museum of Zoology, University of Costa Rica (MZUCR), Rijksmuseum Van Natuurlijke Historie, Leiden, Holland (RMNH) and (Table 1).

By these means of sampling (field collection, donation or loan of species from museums and crustacean collection), we were able to include in our analysis specimens from almost the entire range of distribution of *M. olfersii*, in order to have the most robust possible data set. Unfortunately, species from United States and Guatemala were not sampled. Nevertheless, our sampling effort was enough to analyze the variability of *M. olfersii* due to wide distribution this species.

*Macrobrachium faustinum* and *M. digueti*, which belong to the supposed *M. olfersii* complex [10], were included in our analysis

because they are closest species to *M. olfersii*. *Macrobrachium americanum* Spence Bate, 1868, from Pacific coast of South and Central America, *Macrobrachium lar* (Fabricius, 1798) from Indo-Pacific and *Cryphiops caementarius* (Molina, 1782) from Pacific coast of South America were added. Previous phylogenetic analyses showed that they are closely related to species of the *M. olfersii* complex [36,32,37,27] (Table 1).

*Macrobrachium americanum* and *M. lar* have similar life histories with extended larval development, and similar and diverse geographic distributions. Although *C. caementarius* belong to a different genus, it has been positioned among species of *Macrobrachium* [27]. This questionable phylogenetic position have shown a closely relationship with *M. olfersii* complex [27]. Like the sampling methods of the *M. olfersii* specimens, the exemplars of the *M. faustinum*, *M. digueti* and *M. americanum* were obtained by field collecting from Costa Rica and Panama, others exemplars from Mexico, Jamaica and Venezuela were loaned of the different museums and crustacean collections (described at Table 1).

### Species Identification

Considering the previously reported taxonomic doubts of *Macrobrachium olfersii* complex of species, a detailed comparative study of external morphology of the group (*M. acanthochirus*, *M. crenulatum*, *M. digueti*, *M. faustinum*, *M. hancocki* and *M. olfersii*) was also conducted, and a key for identification of male adults of the *M. olfersii* species-complex will be proposed based on morphological analysis of greater pereiopod (data not shown here). In order to better understand the interspecies differences in morphological characters and provide us a robust support during specimen identification and molecular analysis (Rossi & Mantelatto, in preparation). The identifications were based on the diagnostic morphological traits of *M. olfersii* and related species, in accordance with the literature [9,10,38,15].

Some characteristics that differentiate the species of *M. olfersii* complex are based mainly on shape, ornament and morphometric ratio of the articles of the second pereiopod, such as the number and distribution of tooth on the upper and cutting edge of the

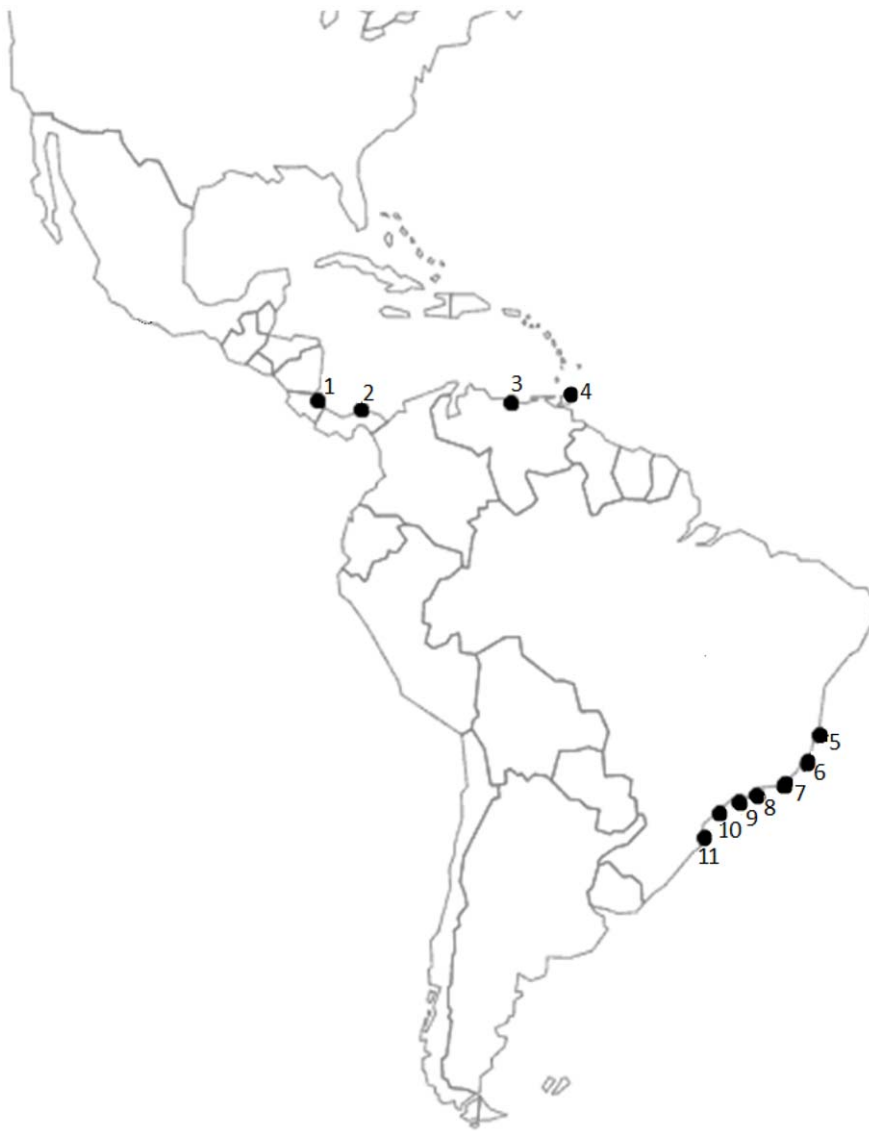

**Figure 1. Locations of *Macrobrachium olfersii* samples used to extract DNA.** 1: CR-AT; 2: PN-AT; 3: VZ-NW; 4: VZ-IM; 5: BR-BA; 6: BR-ES; 7: BR-RJ; 8: BR-SPn; 9: BR-SPs; 10: BR-PR; 11: BR-SC. Abbreviations: see Table 1. doi:10.1371/journal.pone.0054698.g001

**Table 2.** The frequencies of bases of the analyzing genes and the best-fit models selected under Akaike Information Criterion (AIC) on jModeltest for Maximum Likelihood (ML) analysis.

| Gene | Adenine | Cytosine | Guanine | Thymine | Model selected | Invariable sites | Variable sites |
|------|---------|----------|---------|---------|----------------|------------------|----------------|
| 16S  | 0.36    | 0.23     | 0.12    | 0.27    | HKY            | –                | 0.26           |
| COI  | 0.25    | 0.12     | 0.30    | 0.31    | TIM            | 0.63             | 4.41           |
| H3   | 0.20    | 0.32     | 0.28    | 0.18    | TrN            | 0.76             | –              |

Abbreviations: HKY = Hasegawa, Kishino, Yano 85; Transitional model = TIM; Tamura-Nei = TrN.  
doi:10.1371/journal.pone.0054698.t002

fingers, the format of the lower margin of the palm and the ratios obtained from the carpus length/merus length. On second pereiopod of the *M. olfersii*, there are tooth on all upper margin and the lower margin is convex. The carpus is equal or smaller than merus [9,10; Rossi & Mantelatto, in preparation]. However, these small variations can often be different stages of the development or stem as phenotypic plasticity [39,10].

### DNA Extraction, Amplification and Sequencing

Most sequences obtained in this study were generated from our own extractions for this project. These sequences were deposited to Genbank under the accession numbers listed in Table 1. Seven additional comparative sequences from *Macrobrachium lar*, *M. olfersii* and *Cryphiops caementarius* were retrieved from GenBank. Genetic vouchers were deposited in appropriate scientific zoological

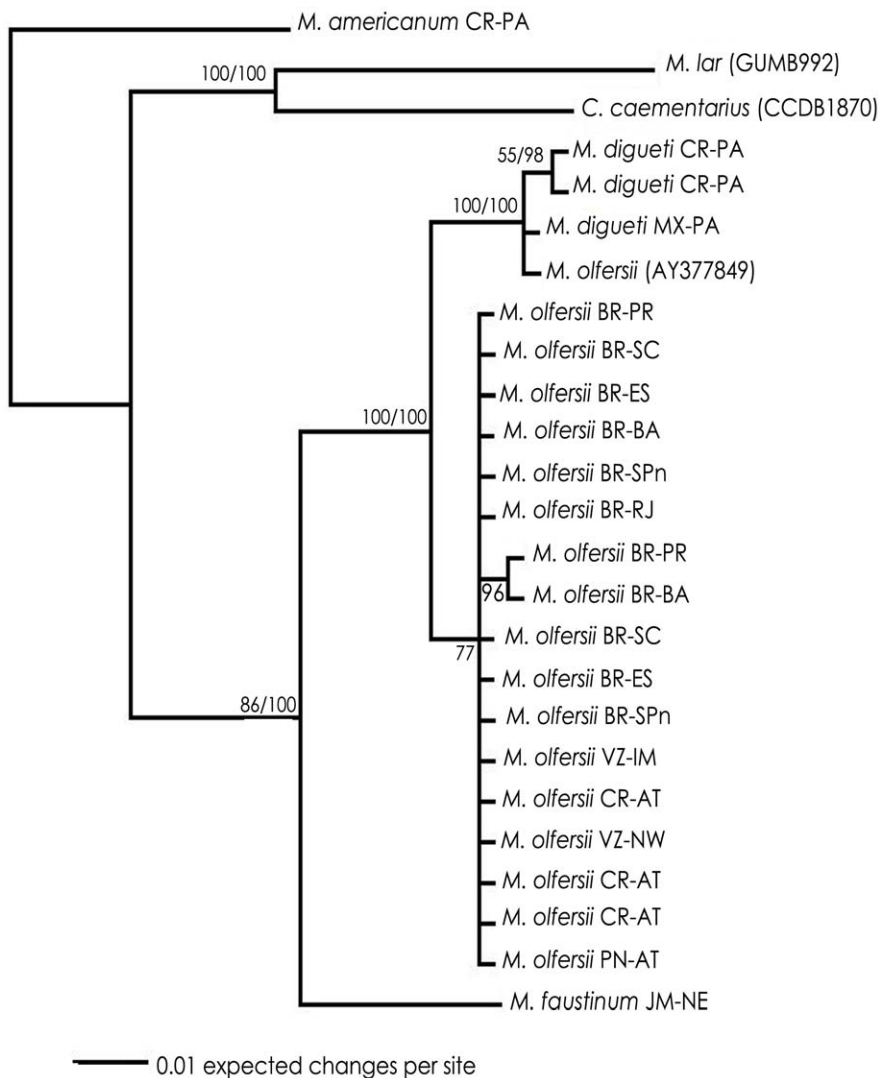

**Figure 2. Phylogenetic tree for populations of *Macrobrachium olfersii*, based on Bayesian Inference analysis of 16S data sets.** Abbreviations and code: see Table 1. Numbers on right: posterior probabilities; Numbers on left: bootstrap obtained on Maximum Likelihood analysis.  
doi:10.1371/journal.pone.0054698.g002

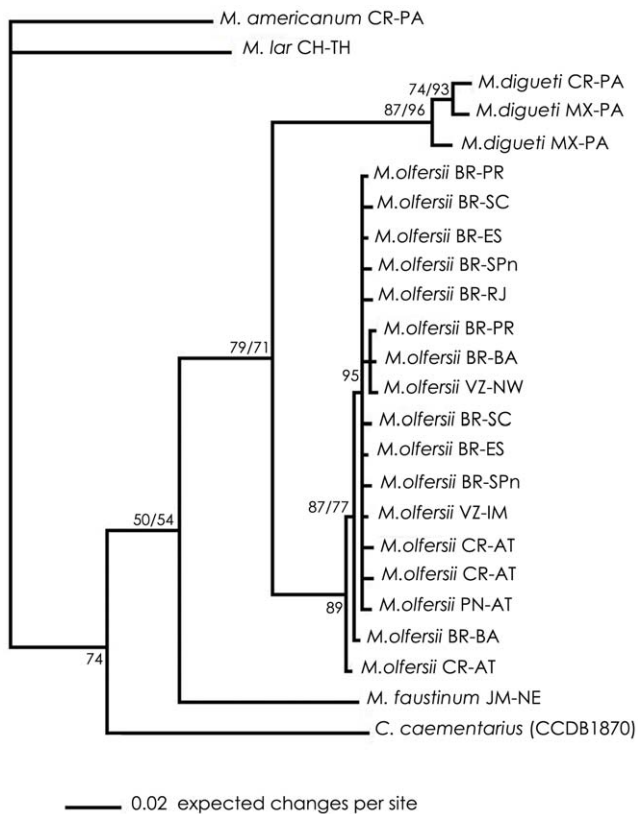

**Figure 3. Phylogenetic tree for populations of *Macrobrachium olfersii*, based on Bayesian Inference analysis of COI data sets.** Abbreviations and code: see Table 1. Numbers on right: posterior probabilities; Numbers on left: bootstrap obtained on Maximum Likelihood analysis.  
doi:10.1371/journal.pone.0054698.g003

collections. DNA was extracted from abdominal or pereopod muscle tissue from 53 *Macrobrachium* specimens from different localities (Table 1 and Fig. 1). When possible, the sequences were obtained from multiple representatives from each collection site.

DNA extraction and amplification procedures followed Mantelatto *et al.* [40,41,42] and Pileggi and Mantelatto [27]. Extracted tissues was macerated and incubated for 12–24 hs in 600 ml of lysis buffer at 65°C. Protein was separated with the addition of 200 ml of ammonium acetate (7.5 M), followed by centrifugation. The addition of 600 ml of cold (–20°C) absolute isopropanol was used for DNA precipitation, also followed by centrifugation. The resulting pellet was then washed with 70% ethanol, dried in a lyophilizer and resuspended in 20 ml of TE buffer.

DNA was amplified by polymerase chain reaction (PCR) using previously tested primers [43,44]: H3ar (ATA TCC TTR GGC ATR ATR GTG AC) and H3af (ATG GCT CGT ACC AAG CAG ACV GC) for the Histone (H3) gene [45], H2 (AGA TAG AAA CCA ACC TGG) and L2 (TGC CTG TTT ATC AAA AAC AT) for the 16S gene [46], and COIa (AGT ATA AGC GTC TGG GTA GTC) and COIf (CCT GCA GGA GGA GGA GAC CC) for the Cytochrome Oxidase I (COI) gene [47].

Reactions were performed in 25 µl volumes containing 6.5 µl of distilled water, 3 µl of 10X PCR buffer II, 3 µl of MgCl<sub>2</sub> (25 mM), 5 µl of betaine (5 M), 1 µl of each primer (10 mM), 4 µl of dNTP (10 mM), 0.5 µl of AmpliTaq DNA polymerase and 1 µl of DNA. Thermal cycling was performed as follows for COI: initial denaturation for 2 min at 94°C, followed by 30 cycles of 30 s at

94°C, 30 s at 50°C, and 60 s at 72°C, with a final extension of 6 min at 72°C. Thermal cycling for 16S and H3:5 min at 98°C, followed by 40 cycles of 45 s at 98°C, 45 s at 48°C, and 45 s at 72°C, with a final extension of 8 min at 72°C. The results of PCRs were looked at electrophoresis with agarose gel (1%).

PCR products were purified using the SureClean Plus kit, and sequenced with the ABI Big Dye® Terminator Mix in an ABI Prism 3100 Genetic Analyzer® following Applied Biosystems protocols. All sequences were confirmed by sequencing both strands. The consensus sequence for the two strands was obtained using BioEdit Version 7.0.7.1 [48]. Sequences were aligned in Clustal W with interface in BioEdit, with the following parameters: gap opening 10 and gap extending 0.2 [49]. Primer and indeterminate regions in beginning of the sequences were cut. The absence of stop codons in COI sequences was checked using the software BioEdit and the invertebrate codon table implemented in Mega 4 [50] in order to confirm the nonexistence of pseudogenes [51]. Apart from that, the consensus sequences were blast on Genbank and compared with our previous sequences.

### Phylogenetic Analyses

All analyses were based on a partial fragment of the 16S mtDNA, COI mtDNA and H3 nDNA genes. The phylogenetic reconstructions were built by the Maximum Likelihood (ML) method in PAUP version 4.0 beta 10 [52]. The appropriate model of evolution was previously selected under the Akaike Information Criterion (AIC) [53] obtained from the jModelTest program [54]. Heuristic searches were used for ML analyses with 100,000 replicates of random sequence additions, and nonparametric bootstrapping consisted of 100 replications [55] with 10 random sequence additions in PAUP. Only values >50% were reported. In order to estimate intra- and interspecific divergence rates, genetic distances were also calculated in PAUP using the uncorrected p distance.

Moreover, phylogenetic hypothesis were also generated by Bayesian Inference - BI in the MrBayes 3.1 program [56] for each gene data and for concatenated genes (three genes and mitochondrial). Bayesian analysis was configured to use the following parameters: sampling frequency 500, four-chain heating (three heated and one cold), and the value of Stop heating chains less than 0.01 after at least 2.5 millions of generations. Subsequently, data were collected from stationary phase and chain the initial states discarded (burning = 15%). The levels of branch support were obtained by the method of posterior probability. Trees generated from both analyzes were saved and edited by Figtree program v.1.3.1 [57].

The haplotype number of the COI sequences from at least three individuals of each studied population of the *M. olfersii* was calculated in DnaSP Version 4.10.9 [58]. The haplotype and nucleotide diversities were calculated for each population using Arlequin Version 3.1 [59]. Haplotype networks were constructed by the statistical parsimony method in TCS (Version 1.21) [60] and by the Median-Joining method in Network [61], with data preparation in DnaSP. Series of analyses of molecular variance (AMOVA) [62] were computed in Arlequin to examine the distribution of genetic variation. Analyses were run based on haplotype frequencies with no hierarchical structure (all populations in a single group) and with a subdivision between Caribbean and Brazilian populations of *M. olfersii*. The significance was tested using a nonparametric permutation procedure [62], incorporating 10,000 permutations.

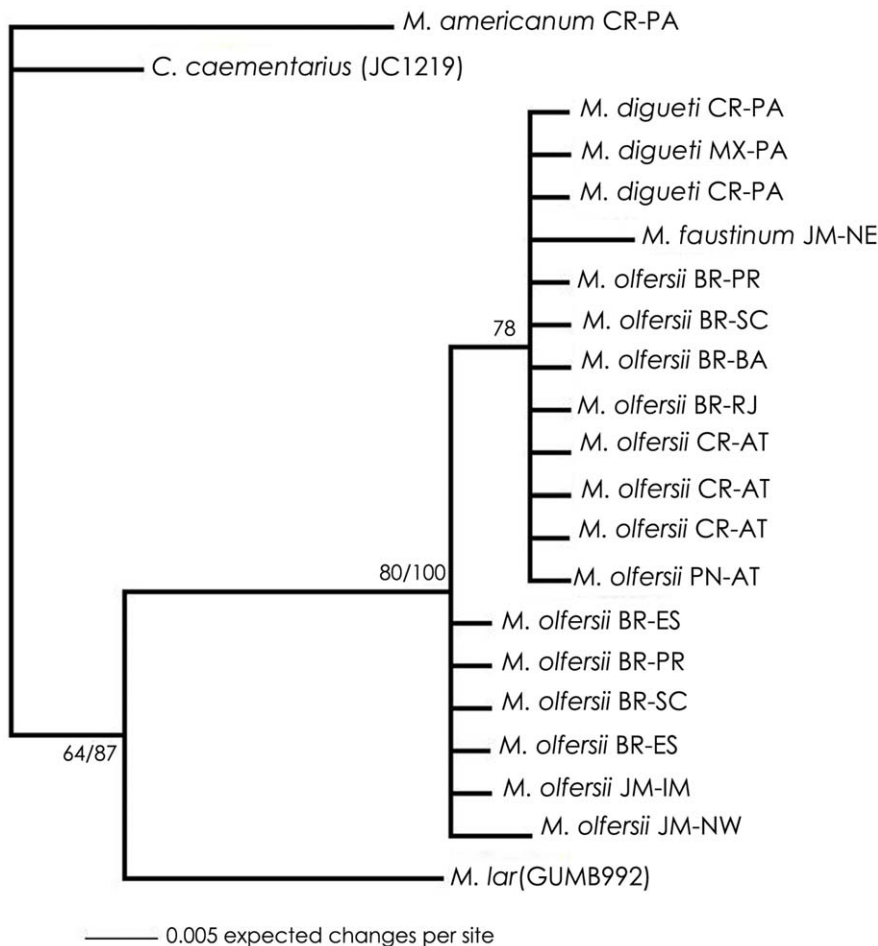

**Figure 4. Phylogenetic tree for populations of *Macrobrachium olfersii*, based on Bayesian Inference analysis of H3 data sets.** Abbreviations and code: see Table 1. Numbers on right: posterior probabilities; Numbers on left: bootstrap obtained on Maximum Likelihood analysis. doi:10.1371/journal.pone.0054698.g004

## Results

In total, 22 sequences with 564 bp of 16S mtDNA, 45 sequences with 638 bp of COI without pseudogenes, and 17 sequences with 338 bp of H3 were generated. The frequencies of bases for each gene and the optimal models selected under AIC to use on Maximum Likelihood analyses (Table 2). The utilized model on Bayesian analysis was GTR for all data set.

Similar topologies were achieved on ML and BI analyses for each gene datasets. Therefore, the trees obtained by BI with posterior probability were revealed and the bootstrap obtained by ML were added (Figs. 2, 3, 4, 5). Disregarding the partial sequence of 16S from *M. olfersii* that was retrieved from GenBank (ID: AY377849), phylogenetic analyses (Figs. 2, 3 and 5) show an evident separation clade from all studied species, but in nuclear, H3 (Fig. 4). Although, the species were not separated in all cases, on BI analysis based on three concatenated genes, we can see a better resolution of the branches and the same topology was obtained on mitochondrial concatenated genes (Fig. 5). Moreover, *M. olfersii* and *M. digueti* formed a sister clade with *M. faustinum* in the phylogenetic tree of 16S, COI and concatenated genes.

In general, distance analyses showed the percentage of intraspecific was lower than interspecific variation. *M. olfersii* data ranged from 0.00 to 0.18% for 16S, 0.00 to 0.95% for COI, and 0.00 to 0.27% for H3. The obtained values between *M. olfersii* and

close species were: *M. digueti*, 1.25% for 16S, ranging from 10.18 to 10.72% for COI and from 0.00 to 0.27% for H3; *M. faustinum*, 3.84% for 16S, ranging from 12.51 to 12.70% for COI and from 0.27 to 0.54% for H3. Among other *Macrobrachium* species, the result was higher than before, e.g., *M. americanum* was 7.70% for 16S, ranging from 17.42 to 17.81% for COI and ranging from 5.92 to 6.26% for H3.

Based on a COI fragment of unambiguous sequence, 28 haplotypes (H) were recognized, which showed a total haplotype diversity of 0.94. Among the haplotypes, 25 (89.28%) represented single individuals, and 3 (10.72%) were polymorphic. The frequencies of haplotypes in different localities were heterogeneous (Table 3). The first haplotype (H1) was shared among three individuals from Paraná (BR-PR), two individuals from northern São Paulo (BR-SPn), one individual from Espírito Santo (BR-ES), one individual from Santa Catarina (BR-SC), one individual from Costa Rica (CR-AT), and one individual from Panama (PN-AT). The third haplotype (H3) was shared between one individual from BR-SPn and one from Costa Rica (CR-AT). The fourth (H4) was shared among one individual from BR-SC, one from BR-SPs, one individual from Bahia (BR-BA), and another from BR-RJ.

Network haplotypes constructed based on the statistical parsimony method (data not shown) were equal to network haplotypes constructed based on the Median-Joining method (Fig. 6). Analysis of molecular variance (AMOVA) indicated that

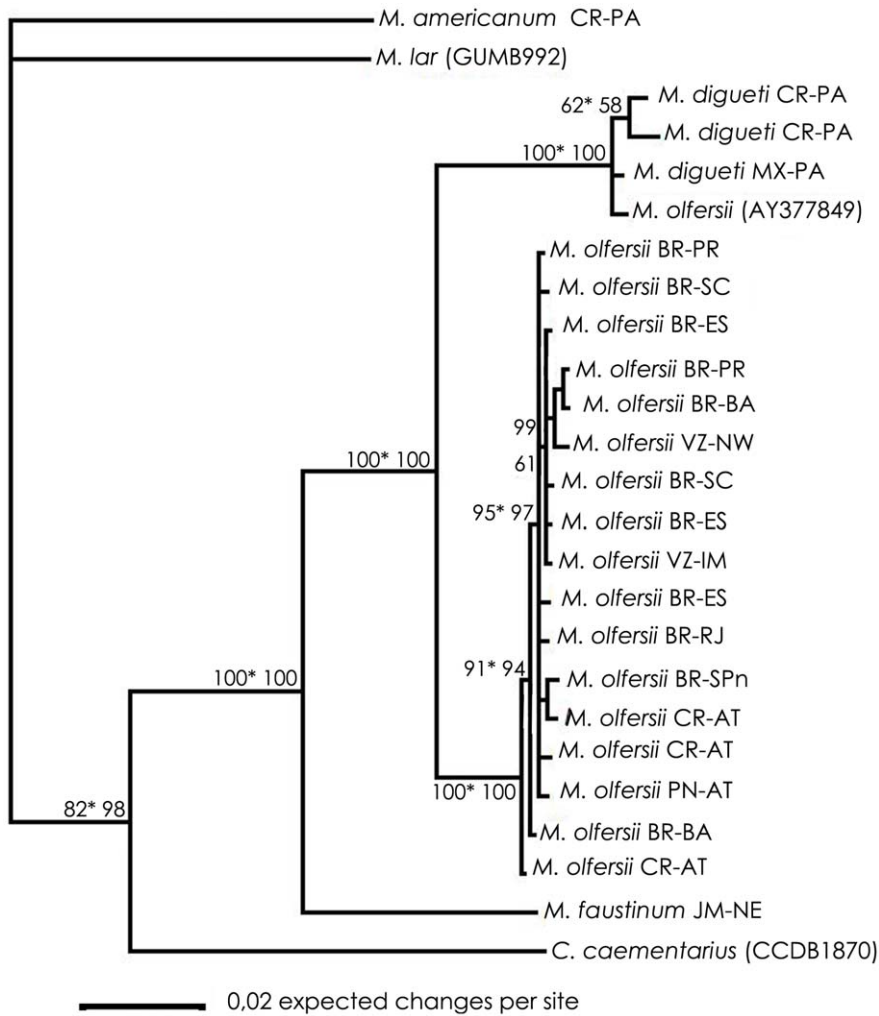

**Figure 5. Phylogenetic tree for populations of *Macrobrachium olfersii*, based on Bayesian Inference analysis of three concatenated genes (16S, COI and H3).** Abbreviations and code: see Table 1. Numbers: posterior probabilities; Asterisk numbers: posterior probabilities obtained by Bayesian Inference analysis of mitochondrial genes (16S and COI concatenated). doi:10.1371/journal.pone.0054698.g005

**Table 3. Distribution of haplotypes detected in *Macrobrachium olfersii* from different localities.**

| Locality | Haplotypes                | N | Hd±Sd     |
|----------|---------------------------|---|-----------|
| CR-AT    | H1,H4, H11, H12, H13, H14 | 6 | 1.00±0.09 |
| PN-AT    | H1, H15, H25              | 3 | 1.00±0.27 |
| VZ-NW    | H10, H28                  | 2 | 1.00±0.50 |
| BR-BA    | H3, H8, H24               | 3 | 1.00±0.27 |
| BR-ES    | H1, H7, H23               | 3 | 1.00±0.27 |
| BR-RJ    | H3, H5, H22               | 3 | 1.00±0.27 |
| BR-SPn   | H1, H4, H21, H26, H27     | 6 | 0.93±0.12 |
| BR-SPs   | H3, H9, H19, H20          | 4 | 1.00±0.17 |
| BR-PR    | H1, H18                   | 4 | 0.50±0.26 |
| BR-SC    | H1, H2, H3, H6, H16, H17  | 6 | 1.00±0.09 |

Abbreviations locality: see Table 1. N: number of individuals analyzed in each population. Hd: haplotype diversity. Sd: standard deviation. doi:10.1371/journal.pone.0054698.t003

specimens within the *M. olfersii* population have the highest percentage of variation (98.25% without hierarchical structure and 98.18% with hierarchical structure), whereas the variation among populations was low (1.75% without hierarchical structure and 1.69% with hierarchical structure). When populations were structured according to Caribbean and Brazilian populations, the variations among groups were very low (0.13%). However the values obtained by AMOVA based on haplotype frequencies with and without hierarchical structure were not significant (Table 4).

## Discussion

Our molecular results confirm the taxonomic status of *M. olfersii* as a valid species by analysis of individuals from Caribbean and Brazilian regions and a close phylogenetic relationship with other related species. Despite the absence of all species within the complex, we chose the closest species (*M. digueti* and *M. faustinum*), which really could be synonymous from *M. olfersii*. As far as we know, after about 43 years since the proposal of a possible morphological species complex, this is the most thorough study using the molecular phylogeny approach to elucidate the status of this species. Different analyses were computed and compared.



**Table 4.** Analysis of molecular variance in *Macrobrachium olfersii*.

| Structure                      | Source of variation | Percentage | Fixation indices | P     |
|--------------------------------|---------------------|------------|------------------|-------|
| <b>Single group</b>            | among populations   | 1.75       | FST: 0.017       | 0.235 |
|                                | within populations  | 98.25      |                  |       |
| <b>Caribbean Vs. Brazilian</b> | among groups        | 0.13       | FCT: 0.001       | 0.356 |
|                                | among populations   | 1.69       | FSC: 0.016       | 0.235 |
|                                | within populations  | 98.18      | FST: 0.018       | 0.256 |

Values were obtained with no hierarchical structure (all populations in a single group) and with a subdivision between Caribbean and Brazilian populations. The Caribbean group included specimens from Costa Rica, Panama and Venezuela. The Brazilian group included specimens from Bahia, Espírito Santo, Rio de Janeiro, São Paulo, Paraná and Santa Catarina.

doi:10.1371/journal.pone.0054698.t004

This methodology had given consistent results, because we can see similar topologies and inferences.

Maximum likelihood (ML) has been considered a good reconstruction method in studies with Decapods [63,27,18,64,31]. These results were compared with obtained by Bayesian Inference (BI) that has also been efficient [65,63,66]. Similar topologies were achieved, although BI showed better resolution of the branches with high posterior probabilities.

We opted by a phylogenetic approach, firstly because of we followed the Phylogenetic Species Concepts sensu Mishler & Theriot [67] as well this methodology spans intraspecific and interspecific evolution and provides evidence fundamental to inferring the process of speciation [68,69]. Others species delimitation methods could be analyzed, such as [17,69]. However, we did diverse analyses and obtained consistent results.

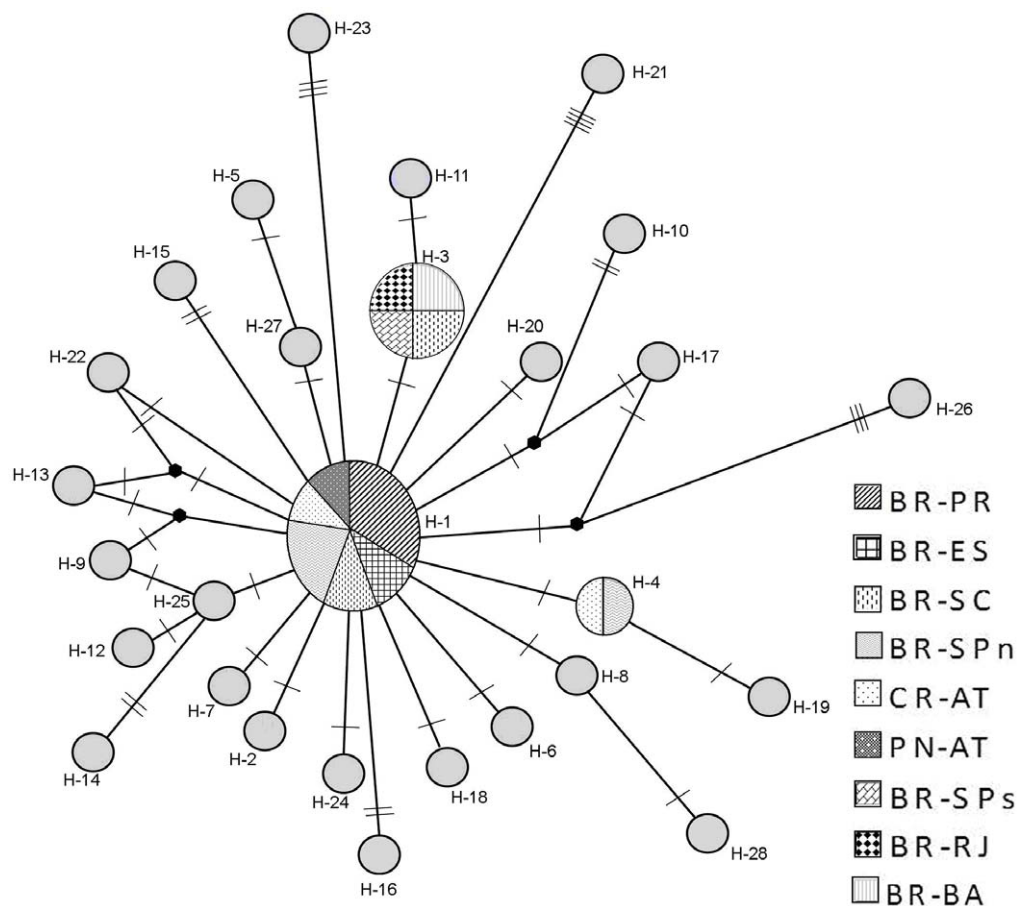

**Figure 6. Haplotype network based on Median-Joining analysis, indicating the distribution of each haplotype found in *Macrobrachium olfersii*.** The haplotype identification is below each circle. Each small trace represents a mutational step. Lines between circles indicate single-substitution differences between haplotypes (the small symbol indicates one missing haplotype inferred for two sequences that differed by two substitutions), and are not proportional to the genetic distance between haplotypes. Pattern coding indicates the origin and the frequency of the shared haplotype, indicated in the legend at right. Abbreviations: see Table 1.

doi:10.1371/journal.pone.0054698.g006

Distance analyses showed that the intraspecific genetic variation within *M. olfersii* is lower than the interspecific variation [27]. This divergence is strongly based on three genes; however, the COI gene shows the most difference among the closest species, corroborating the utility of the COI gene as a good marker to separate close and sibling species. Moreover, within the *M. olfersii* clade illustrated in all phylogenetic analyses, there is no genetic structure and no haplotype fixed in a single population. Therefore, the observed morphological variability must be phenotypic plasticity [10]. In the haplotype network, this condition is supported by haplotype sharing (polymorphic), showing a continuous gene flow among Caribbean and Brazilian populations.

#### *M. olfersii* × *M. digueti*

From the COI datasets, we found that *M. olfersii* remains in a single clade in ML and BI analyses (Fig. 3). However, analyses based on 16S datasets (Fig. 2) and on concatenated genes, the sequence of *M. olfersii* retrieved from GenBank (ID: AY377849) was not separated from *M. digueti* branch. Although this specimen had been not analyzed, these results suggest that the identification of this exemplar is incorrect. On H3 datasets indicated that close congener species appeared inside the *M. olfersii* clade (Fig. 4). Besides, this intimate relationship would be related to the condition of sibling species between *M. olfersii* and *M. digueti* [9].

*Macrobrachium olfersii* occurs on Atlantic and *M. digueti* occurs on Pacific coast of Americas. They are closely related and there are a small number of differences morphological between them. Apart from the condition of sibling species, they are considered cryptic species (Rossi & Mantelatto, in preparation). Their geographic distribution, the obtained divergence by COI and 16S, the phylogenies based on COI analysis confirm the valid of both species. The results by H3 showed the high genetic similarities, due to be more conservative gene. Although we did not clock molecular analysis, we suggested that the split of these species could be associated with closure of the Isthmus of Panama due these genes have lower rates of evolution and the pattern of the geographic distribution.

It is possible that these taxa have radiated following the closure of the Isthmus of Panama, similarly to other decapods such as the snapping shrimps [70]. In contrast, some studies have indicated that some cryptic species-complexes of shrimps show older (pre-Isthmian) divergences that were probably responses to environmental changes [71,72,73]. Consequently, these closely related sibling species cannot be separated by using only conservative genes. The results by H3 nDNA were insufficient to show the difference between these cryptic species. Although using concatenated genes it was not visualized, we suggest the need for future phylogenetic studies using other lines of evidence (such as larval morphology) and larger numbers of specimens to improve our knowledge of the natural relationships between this pair of species.

#### *M. olfersii* × *M. faustinum*

Another fascinating result was the relative positions of *M. olfersii* and *M. faustinum*, which were located on separate branches on all phylogenetic analyses (Figs. 2, 3 and 5), but H3 (Fig. 4), which is too conservative gene. Distance analyses showed the percentage of intraspecific was lower than interspecific variation. *M. olfersii* data ranged from 0.00 to 0.18% for 16S, 0.00 to 0.95% for COI, and 0.00 to 0.27% for H3. The obtained values between *M. olfersii* and *M. faustinum* was 3.84% for 16S, ranging from 12.51 to 12.70% for COI and from 0.27 to 0.54% for H3. In previous study, *Macrobrachium* analyzed ranged 15.6% (*M. americanum* and *M. nattereri*) for 16S and 2.3 (*M. americanum* and *M. carcinus*) to 20.6% (*M. heterochirus* and *M. borelli*) for COI. In the same study it was

showed an intraspecific divergence ranging from 0 to 0.9 for COI from different *M. olfersii* specimens [27].

This fact disagrees with previous morphological studies that suggested that *M. faustinum* is a junior synonym of *M. olfersii*, because of the close similarity between them [74,39,9,11]. The voucher specimen that was deposited in GenBank as *M. faustinum* (ID: HM352461) was analyzed, and its identification is incorrect. Therefore, the sequence for “*M. faustinum*” available in GenBank should be redesignated as *M. olfersii*. This case proves the importance to verify the identification of the specimens before the molecular study and the necessity of the existence of voucher.

Our result is also supported by the geographical distributions of these species. *M. faustinum* occurs only in the West Indies and Florida [9,75,76], but the specimen available in GenBank was from Curarigua, Venezuela (IVIC 1083). *M. olfersii* does not occur in the West Indies [75].

Although the phylogenetic topology obtained here was well supported, another study has been conducted (Rossi & Mantelatto, in preparation) with larger numbers of specimens from some regions and including other related species, in order to complete the entire set of species and improve knowledge of the phylogenetic relationships of the *M. olfersii* complex.

#### Gene Flow and Dispersion

Freshwater prawns of the genus *Macrobrachium* are thought to have originated from marine ancestors in the beginning of the Pleistocene, some of which subsequently migrated towards freshwater in more than one time [77,64]. A colonization of freshwater is considered as the invasion by the ancestor of a lineage followed by the subsequent diversification of that lineage within continental waters [78]. These species acquired many physiological, ecological and behavioral adaptations [77,79,6]. Three basic types of larval developmental patterns can be recognized in this genus there are several species showing transitional developmental models. Some of them need estuarine and freshwater to complete their life cycle, which implicates in recurring migrations between both environments, such as *M. olfersii* [80,6].

Molecular variation among the groups and the populations was not significant, again confirming the occurrence of a continuous gene flow. Consequently, the possibility of differentiation at the genetic level is decreased [81]. The existence of gene flow is plausible, since the *M. olfersii* larvae could be carried out on aquatic plants or associated with cultured species, as may have been the means of introduction of *M. olfersii* into Florida, United States [13]. On the other hand, the species may also have used favorable currents to reach Florida. This latter argument is strengthened by the finding of *M. olfersii* populations in all east-coast drainages of Florida [76].

Following the idea of *M. olfersii* to be undergoing a continuous process of adapting completely for freshwater environments [77,32,64], because it still depends on brackish water, Larvae of *Macrobrachium* can survive in high concentrations (over 30 ppt) of salt water [82,83,80]. *Macrobrachium olfersii* has been found in natural estuarine habitats at salinities up to 36 ppt. This finding indicates that the species has a higher salinity tolerance than was suggested by earlier laboratory studies [83], and it can survive in sea water for extend periods of time [76].

At the same time, studies of the physiology of freshwater shrimps have showed that although the Na<sup>+</sup>/K<sup>+</sup>-ATPase systems of the animals do not function at maximal activity, the Na<sup>+</sup> transport systems respond to salt loading when they are in the process of acclimating to high salinity [79]. We known that larvae of *Macrobrachium* species have a widely dispersion [11,13,83].

Marine current could carry *M. olfersii* larvae over long distances, from southern Brazil to the Caribbean or the contrary, allowing a continuous gene flow.

## Conclusions

In spite of its high morphological variability and wide geographic distribution, *Macrobrachium olfersii* has a lower intraspecific genetic divergence than interspecific. Phylogenetic analysis based on COI mtDNA sequences revealed surely that *M. olfersii* forms a monophyletic clade. Also, there were no differences among the populations. This result confirms that continuous gene flow exists among Caribbean and Brazilian populations of *M. olfersii*, as shown by the haplotype net, and supports the characterization of these populations as a single species. *Macrobrachium digueti* is a sister group, from the Pacific coast.

Moreover, the analysis of 16S mtDNA and H3 nDNA sequences provided evidence that *M. olfersii* has recently diverged from other *Macrobrachium* species from Central America, namely the *M. olfersii* complex. In conclusion, our findings confirm using H3 nDNA and 16S rDNA sequences as molecular markers for separated species identification whereas the COI gene is better suited to address genetic lineages and to explore possible cryptic species. However, addition of data from more specimens and other species is required to enhance the confirmation and resolution of

the phylogenetic relationships of these groups. Morphological studies of the species belonging to this complex are in progress, to complete and elucidate this scenario.

## Acknowledgments

We are deeply grateful to many colleagues and friends (Alexandre Almeida, Darryl Felder, Emerson Mossolin, Fernando Alvarez, Georgina B. Buckup, Ingo Werthmann, José Luis Villalobos, Juan Bolaños, Luis Ernesto Arruda Bezerra, Marcos Tavares, Michael Tuerkay, Peter Schwendinger, and Rodrigo Johnsson) for help in collecting and lending material from collections. Special thanks are due to Leonardo Pileggi, Mariana Terossi, Rafael Robles, other members of LBSC, and Alvaro Costa for help in collecting, making available some essential fresh specimens, and for critical discussions during the preparation of this manuscript. Thanks also to Dr. Janet Reid (JWR Associates) for providing the English review service and the anonymous reviewers for their suggestions and contributions towards improving this paper. The support and assistance of the Postgraduate Program in Comparative Biology of FFCLRP/USP are gratefully acknowledged.

## Author Contributions

Conceived and designed the experiments: NR FLM. Performed the experiments: NR FLM. Analyzed the data: NR FLM. Contributed reagents/materials/analysis tools: NR FLM. Wrote the paper: NR FLM.

## References

- Short JW (2004) A revision of Australian river prawns, *Macrobrachium* (Crustacea: Decapoda: Palaemonidae). *Hydrobiologia*, 525(1–3): 1–100 doi:10.1023/B:HYDR.0000038871.50730.95.
- Munasinghe DHN (2010) Phylogenetic positions of some species of the genus *Macrobrachium* Bate, 1868 (Crustacea, Decapoda, Palaemonidae) in Sri Lanka. *Journal of the National Science Foundation of Sri Lanka*, 38(3): 193–199.
- Wowor D, Muthu V, Meier R, Balke M, Cai Y, et al. (2009) Evolution of life history traits in Asian freshwater prawns of the genus *Macrobrachium* (Crustacea: Decapoda: Palaemonidae) based on multilocus molecular phylogenetic analysis. *Molecular Phylogenetics and Evolution*, 52(1): 340–350 doi:10.1016/j.ympev.2009.01.002.
- De Grave S, Fransen CHJM (2011) Carideorum catalogus: the Recent species of the dendrobranchiate, stenopodidean, procaridean and caridean shrimps (Crustacea: Decapoda). *Zoologische Mededelingen*, 89(5): 195–589 Available: <http://www.zoologischemededelingen.nl/85/nr02/a01>.
- Bauer RT, Delahoussaye J (2008) Life history migrations of the amphidromous river shrimp *Macrobrachium ohione* from a continental large river system. *Journal of Crustacean Biology*, 28(4): 622–632 doi: 10.1651/08-2977.1.
- Bauer RT (2011) Amphidromy and migrations of freshwater shrimps. I. Costs, benefits, evolutionary origins and an unusual case of amphidromy. In: Akira Asakura *et al.* (Eds.) *New frontiers in crustacean biology*. Koninklijke Brill NV, Leiden, 145–156.
- Hedgpeth JW (1949) The North American species of *Macrobrachium* (river shrimp). *Texas Journal of Science*, 1(3): 28–38.
- Bowles DE, Aziz K, Knight CL (2000) *Macrobrachium* (Decapoda: Caridae: Palaemonidae) in the contiguous United States: A review of the species and assessment of threats to their survival. *Journal of Crustacean Biology*, 20(1): 158–171.
- Holthuis LB (1952) A general revision of the Palaemonidae (Crustacea, Decapoda, Natantia) of the Americas II. The subfamily Palaemoninae. Occasional Paper, Allan Hancock Foundation Publications, 12: 1–396.
- Villalobos FA (1969) Problemas de especiación en América de un grupo de Palaemonidae del genero *Macrobrachium*. *Proceedings of the World Scientific Conference on the Biology and Culture of Shrimps and Prawns*. FAO Fisheries Reports, 57(3): 1055–1066.
- Holthuis LB, Provenzano AJ (1970) New distribution records for species of *Macrobrachium* with notes on the distribution of the genus in Florida (Decapoda, Palaemonidae). *Crustaceana*, 19(2): 211–213.
- Ortmann AE (1897) Os camarões de água doce da América do Sul. *Revista do Museu Paulista*, 2: 173–216.
- Anderson G, Filingame JA (1980) The occurrence of *Macrobrachium olfersii* (Wiegmann, 1836) and *Macrobrachium carcinus* (Linnaeus, 1758) in Southern Mississippi, U.S.A. (Decapoda, Palaemonidae). *Crustaceana*, 39(1): 90–94.
- Williams AB (1984). *Shrimps, lobsters and crabs of the Atlantic coast of the eastern United States, Maine to Florida*, Smithsonian Institution Press, Washington, 550pp.
- Melo GAS (2003) Famílias Atyidae, Palaemonidae e Sergestidae. In: Melo, GAS *Manual de identificação dos Crustacea Decapoda de água doce do Brasil*. Editora Loyola, p. 289–415.
- Schwander T, Leimar O (2011) Genes as leaders and followers in evolution. *Trends in Ecology and Evolution*, 26(3): 143–151 doi:10.1016/j.tree.2010.12.010.
- Yang Z, Ranala B (2010) Bayesian species delimitation using multilocus sequence data. *Proceedings of the National Academy of Science of the United States of America*, 107(20): 9264–9269. Available: [www.pnas.org/cgi/doi/10.1073/pnas.0913022107](http://www.pnas.org/cgi/doi/10.1073/pnas.0913022107).
- Vergamini FG, Pileggi LG, Mantelatto FL (2011) Phylogenetic analysis and genetic variability of the Amazon river prawn *Macrobrachium amazonicum* (Decapoda, Caridea, Palaemonidae) from inland and coastal waters. *Contributions to Zoology*, 80(1): 67–83.
- Barros MP (1995) Dados biológicos sobre *Macrobrachium olfersii* (Wiegmann, 1836) (Decapoda: Palaemonidae) da praia da Vigia, Garopava, Santa Catarina, Brasil. *Biociências*, 3(2): 239–252.
- Mossolin EM, Bueno SLS (2002) Reproductive biology of *Macrobrachium olfersii* (Decapoda, Palaemonidae) in São Sebastião, Brazil. *Journal of Crustacean Biology*, 22(2): 367–376 doi: [http://dx.doi.org/10.1651/0278-0372\(2002\)022\[0367:RBOMOD\]2.0.CO;2](http://dx.doi.org/10.1651/0278-0372(2002)022[0367:RBOMOD]2.0.CO;2).
- Mossolin EM, Bueno SLS (2003) Relative growth of the second pereiopod in *Macrobrachium olfersii* (Wiegmann, 1836) (Decapoda, Palaemonidae). *Crustaceana*, 76(3): 363–376 doi: 10.1163/156854003765911748.
- Müller YMR, Nazari EM, Simões-Costa MS (2003) Embryonic stages of the freshwater prawn *Macrobrachium olfersii* (Decapoda, Palaemonidae). *Journal of Crustacean Biology*, 23(4): 869–875 Available: <http://dx.doi.org/10.1651/C-2408>.
- Kuris AM, Ra'Anan Z, Sagi A, Cohen D (1987) Morphotypic differentiation of male Malaysian giant prawns, *Macrobrachium rosenbergii*. *Journal of Crustacean Biology*, 7(2): 219–237 doi: 10.2307/1548603.
- Moraes-Riodades PMC, Valenti WC (2004) Morphotypes in male Amazon river prawns, *Macrobrachium amazonicum*. *Aquaculture*, 236(1–4): 297–307 doi: 10.1016/j.aquaculture.2004.02.015.
- Worham JL, Maurik LN (2012) Morphology and morphotypes of the hawaiian river shrimp, *Macrobrachium grandimanus*. *Journal of Crustacean Biology*, 32(4): 545–556 doi: 10.1163/193724012X637311.
- Ammar D, Müller YMR, Nazari EM (2001) Biologia reprodutiva de *Macrobrachium olfersii* (Wiegmann) (Crustacea: Decapoda: Palaemonidae) coletadas na ilha de Santa Catarina, Brasil. *Revista Brasileira de Biologia*, 18(2): 529–537.
- Pileggi LG, Mantelatto FL (2010) Molecular phylogeny of the freshwater prawn genus *Macrobrachium* (Decapoda, Palaemonidae), with emphasis on the relationships among selected American species. *Invertebrate Systematics*, 24(1): 194–208 doi: <http://dx.doi.org/10.1071/IS09043>.
- Pileggi LG, Mantelatto FL (2012) Taxonomic revision of doubtful Brazilian freshwater shrimp species of genus *Macrobrachium* (Decapoda, Palaemonidae). *Iheringia, Série Zoologia*, 102(4): In press.
- Murphy NP, Austin CM (2004) Multiple origins of the endemic Australian *Macrobrachium* (Decapoda: Palaemonidae) based on 16S rRNA mitochondrial sequences. *Australian Journal of Zoology*, 52(5): 549–559 doi: 10.1071/ZO03062.

30. Rintelen KV, Page TJ, Cai Y, Roe K, Stelbrink B, et al. (2012) Drawn to the dark side: A molecular phylogeny of freshwater shrimps (Crustacea: Decapoda: Caridea: Atyidae) reveals frequent cave invasions and challenges current taxonomic hypotheses. *Molecular Phylogenetics and Evolution*, 63: 82–96 doi: 10.1016/j.ympev.2011.12.015.
31. Torati LS, Mantelatto FL (2012) Ontogenetic and evolutionary change of external morphology of the neotropical shrimp *Potimirim* (Holthuis, 1954) explained by a molecular phylogeny of the genus. *Journal of Crustacean Biology*, 32(4): 625–640 doi: 10.1163/193724012X635322.
32. Liu M, Cai Y, Tzeng C (2007) Molecular systematics of the freshwater prawn genus *Macrobrachium*, Bate, 1868 (Crustacea: Decapoda: Palaemonidae) inferred from mtDNA sequences, with emphasis on East Asian species. *Zoological Studies*, 46(3): 272–289.
33. Baker N, Bruyn M, Mather PB (2008) Patterns of molecular diversity in wild stocks of the redclaw crayfish (*Cherax quadricarinatus*) from Northern Australia and Papua New Guinea: impacts of Plio-Pleistocene landscape evolution. *Freshwater Biology*, 53(8): 1592–1605 doi: 10.1111/j.1365-2427.2008.01996.x.
34. Schubart CD (2009) Mitochondrial DNA and Decapod Phylogenies: The Importance of Pseudogenes and Primer Optimization. In: Martin JW, Crandall KA, Felder DL (Eds), *Crustacean Issues: Decapod Crustacean Phylogenetics*. CRC Press, Boca Raton, 41–65.
35. Crandall KA, Harris DJ, Fetzner JW (2000) The monophyletic origin of freshwater crayfish estimated from nuclear and mitochondrial DNA sequences. *Proceedings Biological Sciences/The Royal Society*, 267(1453): 1679–86 doi: 10.1098/rspb.2000.1195.
36. Murphy NP, Austin CM (2005) Phylogenetic relationships of the globally distributed freshwater prawn genus *Macrobrachium* (Crustacea: Decapoda: Palaemonidae): biogeography, taxonomy and the convergent evolution of abbreviated larval development. *Zoologica Scripta*, 34(2): 184–197 doi: 10.1111/j.1463-6409.2005.00185.x.
37. Bracken HD, Toon A, Felder DL, Martin JW, Finley M, et al. (2009) The decapod tree of life: compiling the data and moving toward a consensus of decapods evolution. *Arthropod Systematics & Phylogeny*, 67(1): 99–116.
38. Valencia DM, Campos MR (2007) Freshwater prawns of the genus *Macrobrachium* Bate, 1868 (Crustacea: Decapoda: Palaemonidae) of Colombia. *Zootaxa*, 1456: 1–44.
39. Sawaya MP (1946) Sobre alguns camarões d'água doce do Brasil. *Boletim da Faculdade de Filosofia, Ciências e Letras da Universidade de São Paulo, Zoologia*, 11: 393–407.
40. Mantelatto FL, Robles R, Felder DL (2007) Molecular phylogeny of the western Atlantic species of the genus *Portunus* (Crustacea: Brachyura, Portunidae). *Zoological Journal of the Linnean Society*, 150(1): 211–220 doi: 10.1111/j.1096-3642.2007.00298.x.
41. Mantelatto FL, Pardo LM, Pileggi LG, Felder DL (2009a) Taxonomic re-examination of the hermit crab species *Pagurus forceps* and *Pagurus comptus* (Decapoda, Paguridae) by molecular analysis. *Zootaxa*, 2133: 20–32.
42. Mantelatto FL, Robles R, Schubart CD, Felder DL (2009b) Molecular phylogeny of the genus *Conius* Stimpson 1860, with reassignment of *C. tumidulus* and several American species of *Portunus* to the genus *Achelous* de Haan, 1833 (Brachyura: Portunidae). In: Martin JW, Crandall KA, Felder DL (Eds), *Crustacean Issues: Decapod Crustacean Phylogenetics*. CRC Press, Boca Raton, 567–579.
43. Porter ML, Pérez-Losada M, Crandall KA (2005) Model-based multi-locus estimation of decapod phylogeny and divergence times. *Molecular Phylogenetics and Evolution*, 37(2): 355–369 doi: 10.1016/j.ympev.2005.06.021.
44. Page TJ, Cook BD, Rintelen T, Rintelen K, Hughes JM (2008) Evolutionary relationships of atyid shrimps imply both ancient Caribbean radiations and common marine dispersals. *Journal of the North American Benthological Society*, 27(1): 68–83 doi: http://dx.doi.org/10.1899/07-044R.1.
45. Colgar DJ, McLauchlan A, Wilson GDF, Livingston SP, Edgecombe GD, et al. (1998) Histone H3 and U2 snRNA DNA sequences and arthropod molecular evolution. *Australian Journal of Zoology*, 46: 419–437 doi: http://dx.doi.org/10.1071/ZO98048.
46. Crandall KA, Fitzpatrick Jr JF (1996) Crayfish molecular systematics: using a combination of procedures to estimate phylogeny. *Systematic Biology*, 45: 1–26 doi: 10.1093/sysbio/45.1.1.
47. Palumbi SR, Benzie J (1991) Large mitochondrial DNA differences between morphologically similar penaeid shrimp. *Molecular Marine Biology and Biotechnology*, 1(1): 27–34.
48. Hall TA (1999) BioEdit: a user-friendly biological sequence alignment editor and analysis program for Windows 95/98/NT. *Nucleic Acids Symposium Series*, 41: 95–98.
49. Thompson JD, Higgins DG, Gibson TJ (1994) CLUSTALW: Improving the sensitivity of progressive multiple sequence alignment through sequence weighting specific gap penalties and weight matrix choice. *Nucleic Acids Research*, 22: 4673–4680 doi: 10.1093/nar/22.22.4673.
50. Kumar S, Dudley J, Nei M, Tamura K (2008) MEGA: A biologist-centric software for evolutionary analysis of DNA and protein sequences. *Briefings in Bioinformatics*, 9: 299–306.
51. Song H, Buhay JE, Whiting MF, Crandall KA (2008) Many species in one: DNA barcoding overestimates the number of species when nuclear mitochondrial pseudogenes are coamplified. *Proceedings of the National Academy of Science of the United States of America*, 105(36): 13486–13491 www.pnas.org/cgi/doi/10.1073/pnas.0803076105.
52. Swofford DL (2003) PAUP: Phylogenetic analysis using parsimony (and other methods). Version 4.0b.10. Sunderland: Sinauer Associates.
53. Posada D, Buckley T (2004) Model selection and model averaging in phylogenetics: advantages of Akaike information criterion and Bayesian approaches over likelihood ratio tests. *Systematic Biology*, 53: 793–808 doi: 10.1080/10635150490522304.
54. Posada D, Crandall KA (1998) ModelTest: testing the model of DNA substitution. *Bioinformatics*, 14(9): 817–818 doi: 10.1093/bioinformatics/14.9.817.
55. Felsenstein J (1985) Confidence limits on phylogenies: an approach using the bootstrap. *Evolution*, 39(4): 783–791 doi: 10.2307/2408678.
56. Huelsenbeck JP, Ronquist F (2001). MrBayes: Bayesian inference of phylogeny. *Bioinformatics*, 17: 754–755.
57. Rambaut A (2007) FigTree. <http://tree.bio.ed.ac.uk/software/figtree/>.
58. Rozas J, Rozas R (1999) DnaSP version 3.0: an integrated program for molecular population genetics and molecular evolution analysis. *Bioinformatics*, 15: 174–175 doi: 10.1093/bioinformatics/15.2.174.
59. Excoffier L, Laval G, Schneider S (2005) Arlequin (version 3.0): an integrated software package for population genetics data analysis. *Evolutionary Bioinformatics Online*, 1: 47–50.
60. Clement M, Posada D, Crandall KA (2000) TCS: a computer program to estimate gene genealogies. *Molecular Ecology*, 9: 1657–1660 doi: 10.1046/j.1365-294x.2000.01020.x.
61. Bandelt HJ, Forster P, Röhl A (1999) Median-joining networks for inferring intraspecific phylogenies. *Molecular Biology and Evolution*, 16: 37–48.
62. Excoffier L, Smouse PE, Quattro JM (1992) Analysis of molecular variance inferred from metric distances among DNA haplotypes: application to human mitochondrial DNA restriction data. *Genetics*, 131: 479–491.
63. Ng PKL, Shih HT, Naruse T, Shy JY (2010) Using Molecular Tools to Establish the Type Locality and Distribution of the Endemic Taiwanese Freshwater Crab *Geothelphusa chiui* Minei, 1974 (Crustacea: Brachyura: Potamidae), with Notes on the Genetic Diversity of *Geothelphusa* from Eastern Taiwan. *Zoological Studies*, 49(4): 544–555.
64. Ashelby CW, Page TJ, De Grave S, Hughes JM, Johnson ML (2012) Regional scale speciation reveals multiple invasions of freshwater in Palaemoninae (decapod). *Zoologica Scripta*, 41(3): 293–306 doi: 10.1111/j.1463-6409.2012.00535.x.
65. Robles R, Tudge C C, Dworschak PC, Poore NCB, Felder DL (2009) Molecular Phylogeny of the Thalassinidea Based on Nuclear and Mitochondrial Genes. In: Martin JW, Crandall KA, Felder DL (Eds), *Crustacean Issues: Decapod Crustacean Phylogenetics*. CRC Press, Boca Raton, 309–326.
66. Schnabel KE, Ah Yong ST, Maas EW (2011) Galatheaidea are not monophyletic – Molecular and morphological phylogeny of the squat lobsters (Decapoda: Anomura) with recognition of a new superfamily. *Molecular Phylogenetics and Evolution*, 58: 157–168 doi: 10.1016/j.ympev.2010.11.011.
67. Mishler BD, Theriot E (2000) The phylogenetic species concept sensu Mishler and Theriot: monophyly, apomorphy, and phylogenetic species concepts. In: Wheeler QD, Meier R (Eds.), *Species concepts and phylogenetic theory: a debate*. Columbia University Press, NY. [Three chapters] Pp.44–54, 119–132, 179–184.
68. Templeton AR (1994) The role of molecular genetics in speciation studies. In: Schierwater B, Streit B, Wagner GP, DeSalle R (Eds) *Molecular Ecology and Evolution: Approaches and Applications*. Birkha-user-Verlag, Basel, 455–477.
69. Ence DD, Carstens BC (2011) SpedeSTEM: a rapid and accurate method for species delimitation. *Molecular Ecology Resources*, 11: 473–480 doi: 10.1111/j.1755-0998.2010.02947.x.
70. Mathews LM (2006) Cryptic biodiversity and phylogeographical patterns in a snapping shrimp species complex. *Molecular Ecology*, 15: 4049–4063 doi: 10.1111/j.1365-294X.2006.03077.x.
71. Knowlton N, Weigt LA, Solórzano LA, Mills DK, Bermingham E (1993) Divergence in proteins, mitochondrial DNA, and reproductive compatibility across the Isthmus of Panama. *Science*, 260: 1629–1632.
72. Knowlton N, Weigt LA (1998) New dates and new rates for divergence across the Isthmus of Panama. *Proceedings of the Royal Society, Biological Sciences*, 265: 2257–2263 doi: 10.1098/rspb.1998.0568.
73. Morrison CL, Rios R, Duffy JE (2004) Phylogenetic evidence for an ancient rapid radiation of Caribbean sponge-dwelling snapping shrimps (*Synalpheus*). *Molecular Phylogenetics and Evolution*, 30: 563–581 doi: 10.1016/S1055-7903(03)00252-5.
74. Rathbun MJ (1900) Results of the Branner-Agassiz Expedition to Brazil I. The decapod and stomatopod Crustacea. *Proceedings of the Washington Academy of Sciences*, 2: 133–156.
75. Chace FA, Hobbs Jr HH (1969) The freshwater and terrestrial decapod crustaceans of the West Indies with special reference to Dominica. *Bulletin of the United States National Museum*, 292: 1–258.
76. Dugger DM, Dobkin S (1975) A contribution to knowledge of the larval development of *Macrobrachium olfersii* (Wiegmann, 1836) (Decapoda: Palaemonidae). *Crustaceana*, 29(1): 1–30 doi: 10.1163/156854075X00018.
77. Jalihal DR, Sankolli KN, Shenoy S (1993) Evolution of larval development and the process of freshwaterization in the prawn genus *Macrobrachium* Bate, 1868 (Decapoda, Palaemonidae). *Crustaceana*, 65: 365–376.
78. Boxshall GA, Jaume D (2000) Making waves: the repeated colonization fresh water by copepod crustaceans. *Advances in Ecological Research*, 31: 61–79.
79. McNamara JC, Torres AH (1999) AID:JEZ3>3.0.CO;2-V.

80. Gamba AL, Rodríguez G (1987) Migratory behavior of postlarval white, *Penaeus schmitti*, and river shrimps, *Macrobrachium olfersi* and *Macrobrachium acanthurus* in their zone of overlap in a tropical lagoon. *Bulletin of Marine Science*, 40(3): 454–463.
81. Slatkin M (1987) Gene flow and the geographic structure of natural populations. *Science*, 236: 787–792 doi: 10.1126/science.3576198.
82. Choudhury PC (1970) Complete larval development of the Palaemonidae shrimp *Macrobrachium acanthurus* (Wiegmann, 1836) reared in the laboratory. *Crustaceana*, 18(2): 113–132.
83. Gamba AL (1982) *Macrobrachium*: its presence in estuaries of the Northern Venezuelan coast (Decapoda, Palaemonidae). *Caribbean Journal of Science*, 18: 1–4.
